# Supplementary material
Source: PubMed Central journal article supplement (PMC2702540)
Supplement: NIHMS99846-supplement-02.pdf [file NIHMS99846-supplement-02.pdf]

## Supplemental Material: Gene expression matrix

| Gene                                                                                     | log(KO/WT) 1 | log(KO/WT) 2 | log(KO/WT) 3 | log(KO/WT) 4 |
|------------------------------------------------------------------------------------------|--------------|--------------|--------------|--------------|
| CD97 antigen                                                                             | -0.039837638 | -0.101334333 | -0.140345392 | -0.049913044 |
| angiopoietin-like 2                                                                      | -0.335720422 | -0.507407811 | -0.276548013 | -0.07604153  |
| ribosomal protein S6 kinase, polypeptide 2                                               | -0.056009673 | -0.083215744 | -0.195063764 | -0.102842222 |
| sterol O-acyltransferase 1                                                               | 0.182544507  | 0.211457791  | 0.220166496  | 0.090425918  |
| solute carrier family 12, member 2                                                       | 0.11485363   | 0.029095705  | 0.118364595  | 0.168359563  |
| spectrin beta 2                                                                          | -0.060075507 | -0.202329208 | -0.16241383  | -0.18195958  |
| regulator of G-protein signaling 2                                                       | 0.18262808   | 0.154237592  | 0.177385843  | 0.063803445  |
| CUG triplet repeat, RNA binding protein 1                                                | 0.070465105  | 0.108147394  | 0.174731961  | 0.087948395  |
| peroxiredoxin 4                                                                          | 0.25283637   | 0.166156421  | 0.229954528  | 0.080246778  |
| ceruloplasmin                                                                            | 0.203734719  | 0.604796285  | 0.435906266  | 0.164196915  |
| SA rat hypertension-associated homolog                                                   | 0.123531319  | 0.258043253  | 0.314968922  | 0.116840107  |
| RIKEN cDNA 5830426I05 gene                                                               | 0.08083083   | 0.118156351  | 0.19170347   | 0.146944386  |
| glycogen synthase 3, brain                                                               | -0.214254787 | -0.271584625 | -0.277115133 | -0.136617361 |
| Kruppel-like factor 5                                                                    | -0.148406561 | -0.1082526   | -0.214462627 | -0.106969274 |
| ATPase, Na <sup>+</sup> /K <sup>+</sup> transporting, alpha 1 polypeptide                | 0.158017158  | 0.077645318  | 0.05970992   | 0.037109383  |
| thymoma viral proto-oncogene 2                                                           | -0.191245094 | -0.285593521 | -0.148252062 | -0.033026888 |
| RIKEN cDNA C630016B22 gene                                                               | -0.043955329 | -0.177023483 | -0.203315621 | -0.108190932 |
| mitochondrial ribosomal protein L33                                                      | 0.087210404  | 0.130404944  | 0.154766894  | 0.164933442  |
| endothelial differentiation, sphingolipid G-protein-coupled receptor, 3                  | -0.311139463 | -0.551137687 | -0.409566993 | -0.101547403 |
| calmodulin 1                                                                             | -0.099247901 | -0.156772198 | -0.201000349 | -0.135154718 |
| glutathione S-transferase, mu 1                                                          | -0.157047557 | -0.092243565 | -0.044201564 | -0.14737004  |
| monocyte to macrophage differentiation-associated                                        | -0.213681115 | -0.337475599 | -0.159688792 | -0.055939151 |
| activating transcription factor 4                                                        | 0.145551965  | 0.230863063  | 0.199971933  | 0.061058976  |
| myogenic differentiation 1                                                               | -0.087459566 | -0.170115497 | -0.198042903 | -0.038789824 |
| glycerol-3-phosphate dehydrogenase 1 (soluble)                                           | -0.288150281 | -0.080558326 | -0.227199254 | -0.108179869 |
| glycogen synthase 3, brain                                                               | -0.214254787 | -0.271584625 | -0.277115133 | -0.136617361 |
| lipoprotein lipase                                                                       | -0.168264752 | -0.16478225  | -0.250156995 | -0.065378136 |
| hypermethylated in cancer 1                                                              | -0.155744438 | -0.198846666 | -0.017696207 | -0.116291274 |
| endothelial differentiation, sphingolipid G-protein-coupled receptor, 3                  | -0.311139463 | -0.551137687 | -0.409566993 | -0.101547403 |
| transcription factor 20                                                                  | 0.071419734  | 0.139096259  | 0.066574315  | 0.044759462  |
| actin, beta, cytoplasmic                                                                 | 0.176807912  | 0.389467422  | 0.17541223   | 0.157488254  |
| insulin-like growth factor binding protein 5                                             | -0.28999389  | -0.898241456 | -0.383799392 | -0.057724692 |
| connective tissue growth factor                                                          | 0.307970802  | 0.139013689  | 0.249415221  | 0.057445272  |
| tyrosine 3-monooxygenase/tryptophan 5-monooxygenase activation protein, beta polypeptide | -0.050945131 | -0.15656402  | -0.092194731 | -0.086636066 |
| upregulated during skeletal muscle growth 5                                              | 0.085025845  | 0.037763117  | 0.166887259  | 0.07130813   |
| calsyntenin 1                                                                            | -0.177928557 | -0.206783718 | -0.119282969 | -0.10912871  |
| ribosomal protein L36                                                                    | 0.066648108  | 0.177306027  | 0.157203735  | 0.050266062  |
| small nuclear ribonucleoprotein E                                                        | 0.113790324  | 0.076992322  | 0.198227498  | 0.04794441   |
| endothelial-specific receptor tyrosine kinase                                            | -0.120928345 | -0.076954614 | -0.152617613 | -0.055565743 |
| chloride channel 4-2                                                                     | -0.065958643 | -0.137965852 | -0.105991444 | -0.049474614 |
| novel nuclear protein 1                                                                  | -0.209534826 | -0.27967131  | -0.206513025 | -0.080506328 |
| ATPase, Na <sup>+</sup> /K <sup>+</sup> transporting, alpha 1 polypeptide                | 0.158017158  | 0.077645318  | 0.05970992   | 0.037109383  |
| calpain 1                                                                                | -0.079782587 | -0.215287263 | -0.166032294 | -0.125955166 |
| amyloid beta (A4) precursor protein                                                      | -0.11195105  | -0.23371238  | -0.218340121 | -0.047569616 |
| CUG triplet repeat, RNA binding protein 1                                                | 0.070465105  | 0.108147394  | 0.174731961  | 0.087948395  |

## Supplemental Material: Connectivity references

| Gene                                                                                     | MYOD | MYF5 | MYOG | PAX3 | PAX7 | SRF | SIX1 | SIX4 | SIX5 | MEF2 | NUR77 |
|------------------------------------------------------------------------------------------|------|------|------|------|------|-----|------|------|------|------|-------|
| CD97 antigen                                                                             | 2    |      | 1    |      |      |     |      |      |      |      |       |
| angiotensin-like 2                                                                       | 2    |      |      |      |      |     |      |      |      |      |       |
| ribosomal protein S6 kinase, polypeptide 2                                               | 2    |      |      |      |      |     |      |      |      |      |       |
| sterol O-acyltransferase 1                                                               | 2    |      |      |      |      |     |      |      |      |      |       |
| solute carrier family 12, member 2                                                       | 2    |      |      |      |      |     | 13   | 13   |      |      |       |
| spectrin beta 2                                                                          | 2    |      |      |      |      |     |      |      |      |      |       |
| regulator of G-protein signaling 2                                                       | 2    |      |      |      |      |     |      |      |      |      |       |
| CUG triplet repeat, RNA binding protein 1                                                | 2    |      |      |      |      |     |      |      |      |      |       |
| peroxiredoxin 4                                                                          | 2,3  |      |      |      |      |     |      |      |      |      |       |
| ceruloplasmin                                                                            | 2    |      |      |      |      |     |      |      |      |      |       |
| SA rat hypertension-associated homolog                                                   | 2    |      |      |      |      |     |      |      |      |      |       |
| RIKEN cDNA 5830426105 gene                                                               | 2    |      |      |      |      |     |      |      |      |      |       |
| glycogen synthase 3, brain                                                               | 3    |      |      |      |      |     |      |      |      |      |       |
| Kruppel-like factor 5                                                                    | 3    |      |      |      |      |     |      |      |      |      |       |
| ATPase, Na <sup>+</sup> /K <sup>+</sup> transporting, alpha 1 polypeptide                | 3,8  |      |      |      |      |     |      |      |      |      |       |
| thymoma viral proto-oncogene 2 (akt2)                                                    | 3    |      | 4    |      |      |     |      |      |      |      |       |
| RIKEN cDNA C630016B22 gene                                                               | 3    |      |      |      |      |     |      |      |      |      |       |
| mitochondrial ribosomal protein L33                                                      | 3    |      |      |      |      |     |      |      |      |      |       |
| endothelial differentiation, sphingolipid G-protein-coupled receptor, 3                  | 3,7  |      |      |      |      |     |      |      |      |      |       |
| calmodulin 1                                                                             |      |      | 4    |      |      |     |      |      |      |      |       |
| glutathione S-transferase, mu 1                                                          | 4    |      |      |      |      |     |      |      |      |      |       |
| monocyte to macrophage differentiation-associated                                        |      |      | 4    |      |      |     |      |      |      |      |       |
| activating transcription factor 4                                                        | 4    |      | 4    |      |      |     |      |      |      |      |       |
| myogenic differentiation 1                                                               |      |      |      | 9    |      | 14  |      |      |      | 5    |       |
| glycerol-3-phosphate dehydrogenase 1 (soluble)                                           |      |      |      |      |      |     |      |      |      |      | 6     |
| glycogen synthase 3, brain                                                               |      |      |      |      |      |     |      |      |      |      | 6     |
| lipoprotein lipase                                                                       |      |      |      |      |      |     |      |      |      |      | 6     |
| hypermethylated in cancer 1                                                              | 7    |      |      |      |      |     |      |      |      |      |       |
| endothelial differentiation, sphingolipid G-protein-coupled receptor, 3                  | 7    |      |      |      |      |     |      |      |      |      |       |
| transcription factor 20                                                                  |      | 7    |      |      |      |     |      |      |      |      |       |
| actin, beta, cytoplasmic                                                                 |      | 7    |      |      |      |     |      |      |      |      |       |
| insulin-like growth factor binding protein 5                                             | 2,7  | 7    | 7    | 12   |      |     |      |      | 16   |      |       |
| connective tissue growth factor                                                          |      | 7    |      |      |      |     |      |      |      |      |       |
| tyrosine 3-monooxygenase/tryptophan 5-monooxygenase activation protein, beta polypeptide |      | 7    |      |      |      |     |      |      |      |      |       |
| upregulated during skeletal muscle growth 5                                              | 8    |      |      |      |      |     |      |      |      |      |       |
| calsyntenin 1                                                                            | 8    |      |      |      |      |     |      |      |      |      |       |
| ribosomal protein L36                                                                    | 8    |      |      |      |      |     |      |      |      |      |       |
| small nuclear ribonucleoprotein E                                                        | 8    |      |      |      |      |     |      |      |      |      |       |
| endothelial-specific receptor tyrosine kinase                                            |      |      |      | 9    |      |     |      |      |      |      |       |
| chloride channel 4-2                                                                     |      |      |      |      |      |     |      |      |      | 10   |       |
| novel nuclear protein 1                                                                  |      |      |      |      |      | 11  |      |      |      |      |       |
| ATPase, Na <sup>+</sup> /K <sup>+</sup> transporting, alpha 1 polypeptide                |      |      |      |      |      |     | 13   |      | 16   |      |       |
| calpain 1                                                                                |      |      |      | 9    |      |     |      |      |      |      |       |
| amyloid beta (A4) precursor protein                                                      |      |      |      | 9    |      |     |      |      |      |      |       |
| CUG triplet repeat, RNA binding protein 1                                                |      |      | 15   |      |      |     |      |      |      |      |       |

1. Davie, J.K., J.H. Cho, E. Meadows, J.M. Flynn, J.R. Knapp, and W.H. Klein, *Target gene selectivity of the myogenic basic helix-loop-helix transcription factor myogenin in embryonic muscle*. Dev. Biol. 2007; **311**(2): 650-64.
2. Bergstrom, D.A., B.H. Penn, A. Strand, R.L. Perry, M.A. Rudnicki, and S.J. Tapscott, *Promoter-specific regulation of MyoD binding and signal transduction cooperate to pattern gene expression*. Mol. Cell 2002; **9**(3): 587-600.
3. de la Serna, I.L., Y. Ohkawa, C.A. Berkes, D.A. Bergstrom, C.S. Dacwag, S.J. Tapscott, and A.N. Imbalzano, *MyoD targets chromatin remodeling complexes to*

- the myogenin locus prior to forming a stable DNA-bound complex. Mol. Cell. Biol.* 2005; **25**(10): 3997-4009.
4. Cao, Y., R.M. Kumar, B.H. Penn, C.A. Berkes, C. Kooperberg, L.A. Boyer, R.A. Young, and S.J. Tapscott, *Global and gene-specific analyses show distinct roles for Myod and Myog at a common set of promoters. EMBO J.* 2006; **25**(3): 502-11.
  5. Black, B.L. and E.N. Olson, *Transcriptional control of muscle development by myocyte enhancer factor-2 (MEF2) proteins. Annu. Rev. Cell Dev. Biol.* 1998; **14**: 167-96.
  6. Chao, L.C., Z. Zhang, L. Pei, T. Saito, P. Tontonoz, and P.F. Pilch, *Nur77 coordinately regulates expression of genes linked to glucose metabolism in skeletal muscle. Mol. Endocrinol.* 2007; **21**(9): 2152-63.
  7. Ishibashi, J., R.L. Perry, A. Asakura, and M.A. Rudnicki, *MyoD induces myogenic differentiation through cooperation of its NH<sub>2</sub>- and COOH-terminal regions. J. Cell Biol.* 2005; **171**(3): 471-82.
  8. Bean, C., M. Salamon, A. Raffaello, S. Campanaro, A. Pallavicini, and G. Lanfranchi, *The Ankrd2, Cdkn1c and calcyclin genes are under the control of MyoD during myogenic differentiation. J. Mol. Biol.* 2005; **349**(2): 349-66.
  9. Mayanil, C.S., D. George, L. Freilich, E.J. Miljan, B. Mania-Farnell, D.G. McLone, and E.G. Bremer, *Microarray analysis detects novel Pax3 downstream target genes. J. Biol. Chem.* 2001; **276**(52): 49299-309.
  10. Paris, J., C. Virtanen, Z. Lu, and M. Takahashi, *Identification of MEF2-regulated genes during muscle differentiation. Physiol Genomics* 2004; **20**(1): 143-51.
  11. White, R.B. and M.R. Ziman, *Genome-wide discovery of Pax7 target genes during development. Physiol. Genomics* 2008; **33**(1): 41-49.
  12. Khan, J., M.L. Bittner, L.H. Saal, U. Teichmann, D.O. Azorsa, G.C. Gooden, W.J. Pavan, J.M. Trent, and P.S. Meltzer, *cDNA microarrays detect activation of a myogenic transcription program by the PAX3-FKHR fusion oncogene. Proc. Natl. Acad. Sci. U. S. A.* 1999; **96**(23): 13264-9.
  13. Ando, Z., S. Sato, K. Ikeda, and K. Kawakami, *Slc12a2 is a direct target of two closely related homeobox proteins, Six1 and Six4. Febs J* 2005; **272**(12): 3026-41.
  14. Forcales, S.V. and P.L. Puri, *Signaling to the chromatin during skeletal myogenesis: novel targets for pharmacological modulation of gene expression. Semin. Cell Dev. Biol.* 2005; **16**(4-5): 596-611.

15. Huichalaf, C.H., K. Sakai, G.L. Wang, N.A. Timchenko, and L. Timchenko, *Regulation of the promoter of CUG triplet repeat binding protein, Cugbp1, during myogenesis*. *Gene* 2007; **396**(2): 391-402.
16. Sato, S., M. Nakamura, D.H. Cho, S.J. Tapscott, H. Ozaki, and K. Kawakami, *Identification of transcriptional targets for Six5: implication for the pathogenesis of myotonic dystrophy type 1*. *Hum. Mol. Genet.* 2002; **11**(9): 1045-58.

Supplemental Material: Control strength matrix

| Name          | MYOD      | MYF5      | MYOG      | PAX3     | SRF      | MEF2      | NUR77    |
|---------------|-----------|-----------|-----------|----------|----------|-----------|----------|
| Cd97          | -1.46E+00 | 0         | -1.49E-01 | 0        | 0        | 0         | 0        |
| Angptl2       | -5.74E-01 | 0         | 0         | 0        | 0        | 0         | 0        |
| Rps6ka2       | -9.00E-01 | 0         | 0         | 0        | 0        | 0         | 0        |
| Soat1         | 1.01E+00  | 0         | 0         | 0        | 0        | 0         | 0        |
| Spnb2         | -4.02E-01 | 0         | 0         | 0        | 0        | 0         | 0        |
| Rgs2          | 7.23E-01  | 0         | 0         | 0        | 0        | 0         | 0        |
| Cugbp1        | 1.11E+00  | 0         | 0         | 0        | 0        | 0         | 0        |
| Prdx4         | 5.56E-01  | 0         | 0         | 0        | 0        | 0         | 0        |
| Cp            | 9.48E-01  | 0         | 0         | 0        | 0        | 0         | 0        |
| Sah           | 1.20E+00  | 0         | 0         | 0        | 0        | 0         | 0        |
| 5830426I05Rik | 7.36E-01  | 0         | 0         | 0        | 0        | 0         | 0        |
| Gys3          | -1.09E+00 | 0         | 0         | 0        | 0        | 0         | 0        |
| Klf5          | -8.39E-01 | 0         | 0         | 0        | 0        | 0         | 0        |
| Atp1a1        | -2.59E-01 | 0         | 0         | 0        | 0        | 0         | 0        |
| Akt2          | 4.35E+00  | 0         | 2.68E+00  | 0        | 0        | 0         | 0        |
| C630016B22Rik | -1.04E+00 | 0         | 0         | 0        | 0        | 0         | 0        |
| Mrpl33        | 2.75E-01  | 0         | 0         | 0        | 0        | 0         | 0        |
| Edg3          | -9.06E-01 | 0         | 0         | 0        | 0        | 0         | 0        |
| Calm1         | 0         | 0         | 5.39E-01  | 0        | 0        | 0         | 0        |
| Gstm1         | 1.19E+00  | 0         | 0         | 0        | 0        | 0         | 0        |
| Mmd           | 0         | 0         | 3.58E-01  | 0        | 0        | 0         | 0        |
| Atf4          | -2.15E+00 | 0         | -1.73E+00 | 0        | 0        | 0         | 0        |
| Myod1         | 0         | 0         | 0         | 1.39E+00 | 1.92E-01 | -5.08E-01 | 0        |
| Gpd1          | 0         | 0         | 0         | 0        | 0        | 0         | 7.18E-01 |
| Gys3          | 0         | 0         | 0         | 0        | 0        | 0         | 1.08E+00 |
| Lpl           | 0         | 0         | 0         | 0        | 0        | 0         | 1.21E+00 |
| Hic1          | 5.84E-01  | 0         | 0         | 0        | 0        | 0         | 0        |
| Edg3          | -9.06E-01 | 0         | 0         | 0        | 0        | 0         | 0        |
| Tcf20         | 0         | 1.14E+00  | 0         | 0        | 0        | 0         | 0        |
| Actb          | 0         | 1.21E+00  | 0         | 0        | 0        | 0         | 0        |
| Ctgf          | 0         | -4.62E-01 | 0         | 0        | 0        | 0         | 0        |
| Ywhab         | 0         | -1.19E+00 | 0         | 0        | 0        | 0         | 0        |
| Usmg5         | 6.92E-01  | 0         | 0         | 0        | 0        | 0         | 0        |
| Clstn1        | -6.83E-02 | 0         | 0         | 0        | 0        | 0         | 0        |
| Rpl36         | 1.09E+00  | 0         | 0         | 0        | 0        | 0         | 0        |
| Snrpe         | 9.46E-01  | 0         | 0         | 0        | 0        | 0         | 0        |
| Tek           | 0         | 0         | 0         | 5.78E-01 | 0        | 0         | 0        |
| Clcn4-2       | 0         | 0         | 0         | 0        | 0        | 1.49E+00  | 0        |
| Nnp1          | 0         | 0         | 0         | 0        | 1.81E+00 | 0         | 0        |
| Capn1         | 0         | 0         | 0         | 8.92E-01 | 0        | 0         | 0        |
| App           | 0         | 0         | 0         | 1.14E+00 | 0        | 0         | 0        |
| Cugbp1        | 0         | 0         | -5.44E-01 | 0        | 0        | 0         | 0        |
